# Supplementary material
Source: PubMed Central journal article supplement (PMC2875814)
Supplement: en.2010-0081_1.pdf [file en.2010-0081_1.pdf]

## Supplemental Figure Legends

**Figure 1.** *In situ* hybridization analysis was performed to detect RIP140 mRNA in WT ovaries at different stages of follicle development. There was an increase in RIP140 expression with eCG injection. A (untreated ovaries), B (6h eCG), C (24h eCG) and D (48h eCG) show expression localised primarily in the granulosa cells of the growing secondary as well as mural (Mu) and cumulus granulosa (Cu) cells of the antral follicles. E and F show expression in the inner layers of the mural granulosa cells and cumulus cells in the unexpanded (3h hCG) and expanded COCs (10h hCG) respectively (Scale Bar: 100  $\mu$ M).

**Figure 2.** Quantitative PCR analysis of RIP140 expression in WT COCs. COCs were obtained from 48h eCG treated animals and cultured for 4, 8 and 16h with 100 ng/ml AREG. (n=3-4, each experiment a pool of 2-3 animals). Similar levels of RIP140 expression was maintained throughout this time course.

**Figure 3.** COCs isolated from WT and RIP140 KO ovaries after eCG treatment, cultured for 8 and 16h in the presence of 100 ng/ml each of AREG, EREG and BTC (Scale Bar: 100  $\mu$ M).

**Figure 4.** Cumulus Expansion Index score of the COCs in Fig. S3.

**Figure 5.** Quantitative PCR analysis of *Ereg* expression in cultured granulosa cells from WT and RIP140 KO ovaries cultured with, 300 ng/ml AREG, 10 $\mu$ M Forskolin or 500 ng/ml PGE2 for 4 hrs.

**Figure 6.** Quantitative PCR analysis of *Areg* expression in the WTF4 granulosa cells after treatment with forskolin (10 $\mu$ M), AREG (300 ng/ml) and PGE2 (500 ng/ml) at 0h, 1h and 4h.

**Figure 7.** (A) Chromatin immunoprecipitation (ChIP assays) of WTF4 granulosa cells using antibodies specific for RIP140, p-CREB and c-Jun or nonspecific IgG in untreated or forskolin stimulated cells. Precipitated fragments were analysed by real-time PCR using an upstream region of the *Areg* promoter and GAPDH promoter (n=2).

**Table 1.** Primers used for making *in situ* probes

**Table 2.** Primers used for Q-PCRs, ChIP assays, deletion constructs and siRNA.

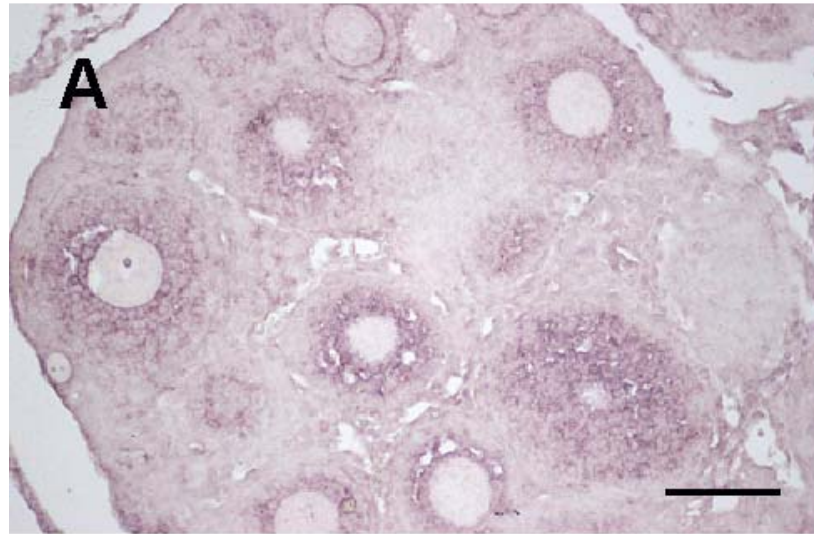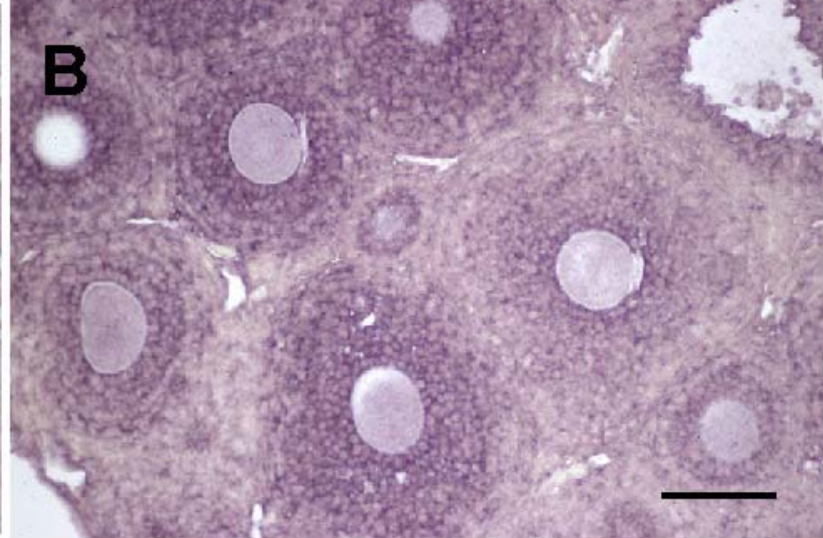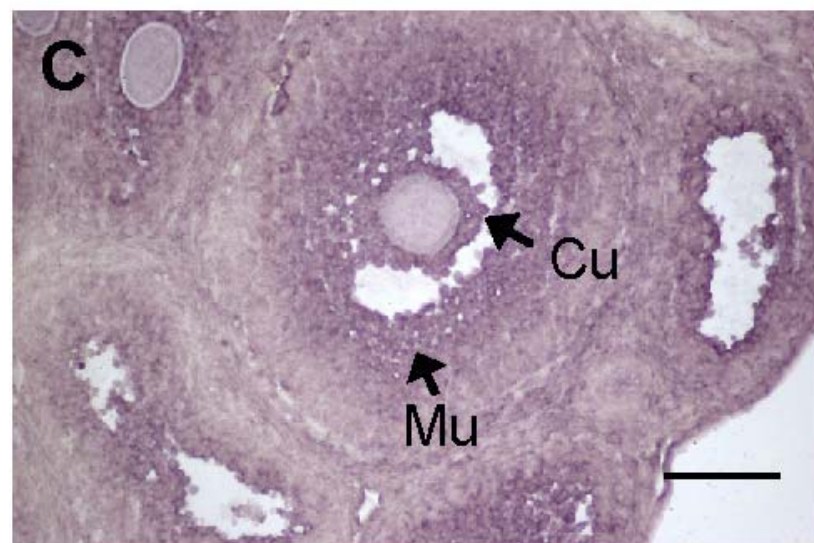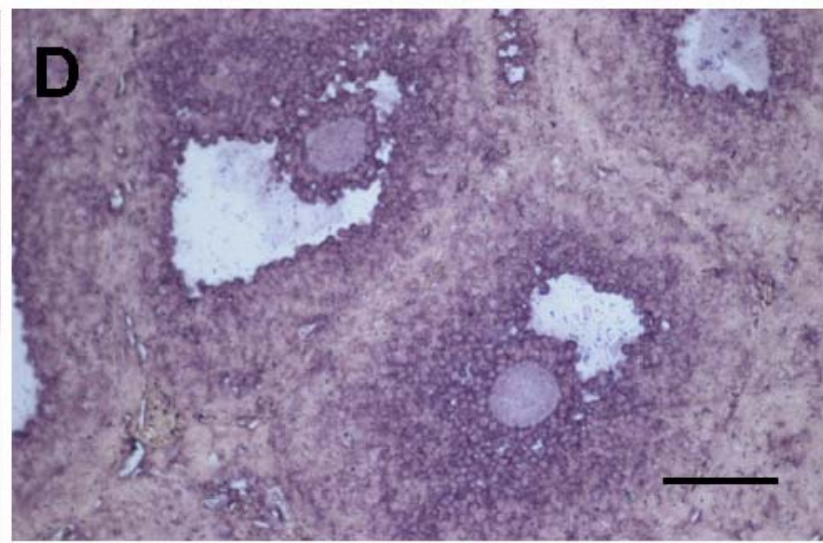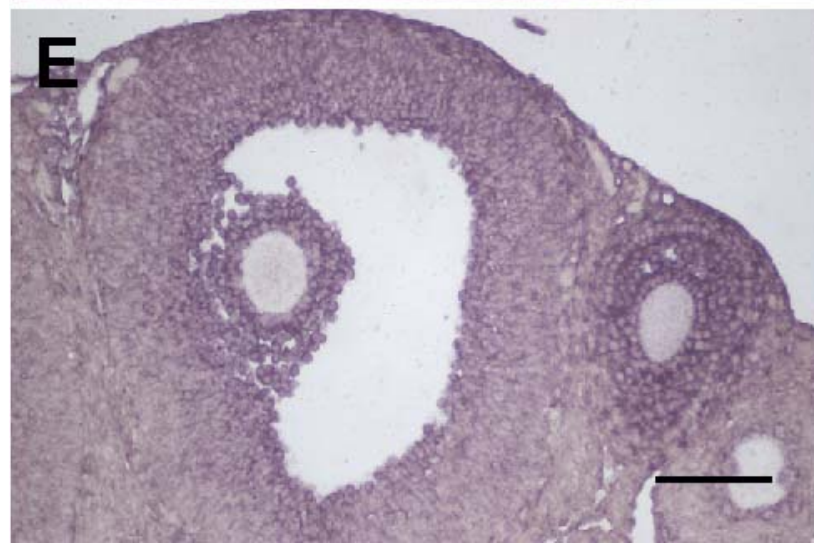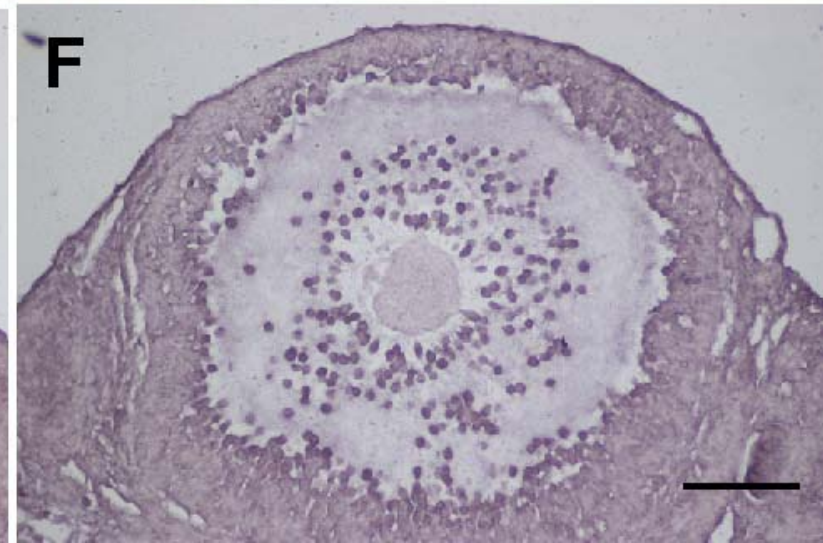

# *RIP140*

Relative Expression

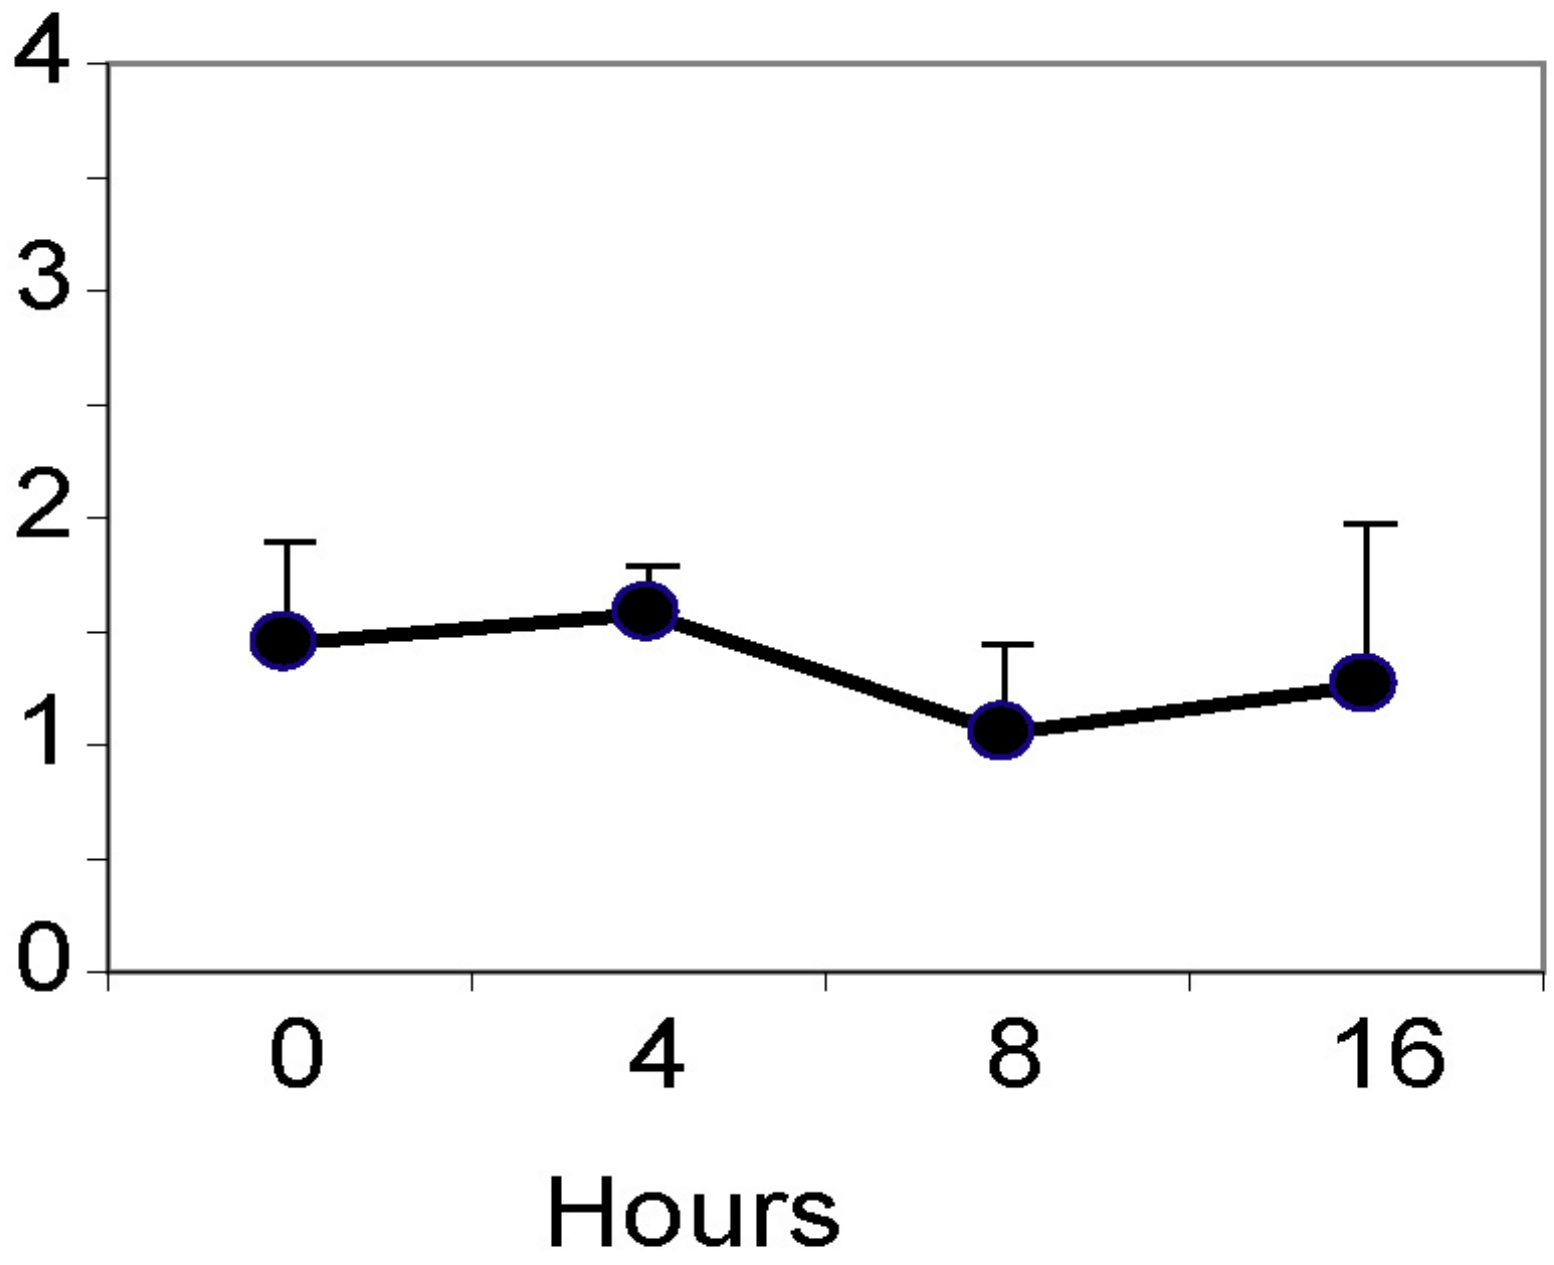



8h

WT

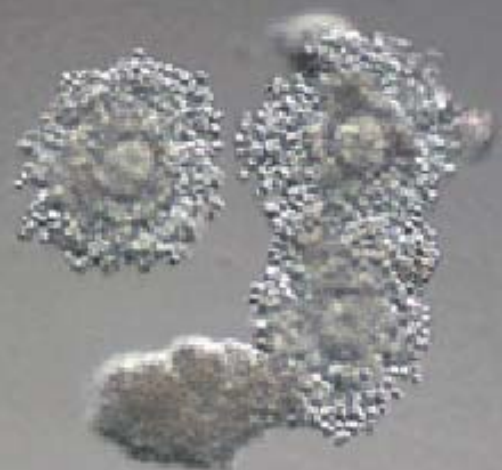

8h

KO

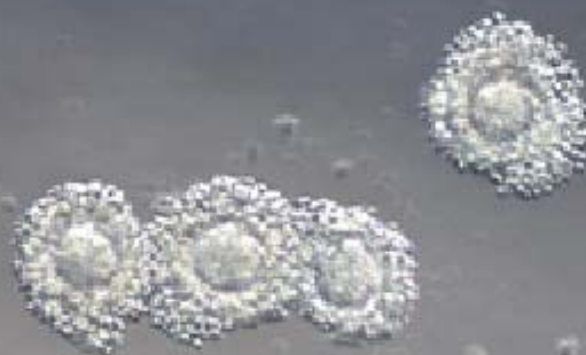

16h

WT

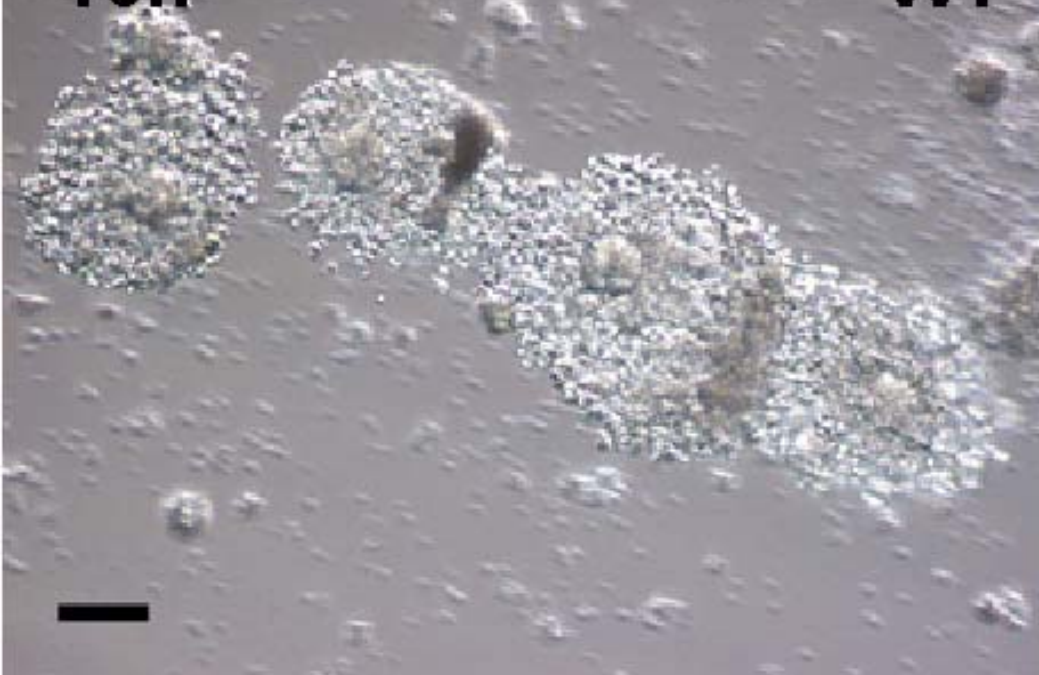

16h

KO

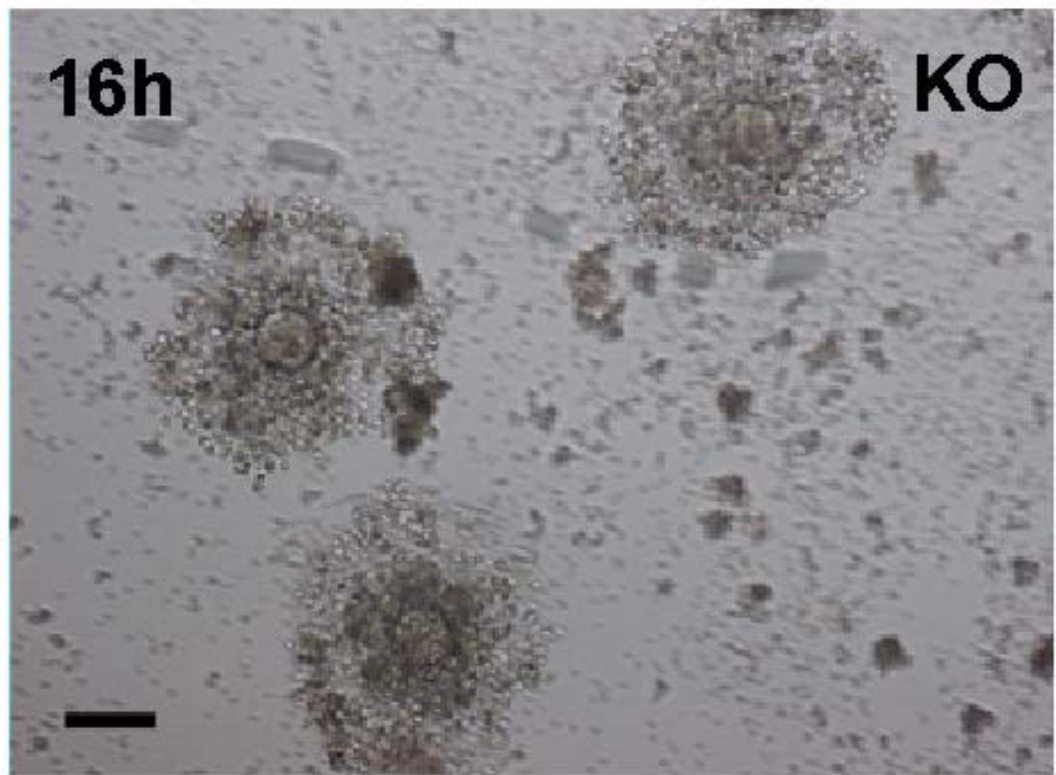

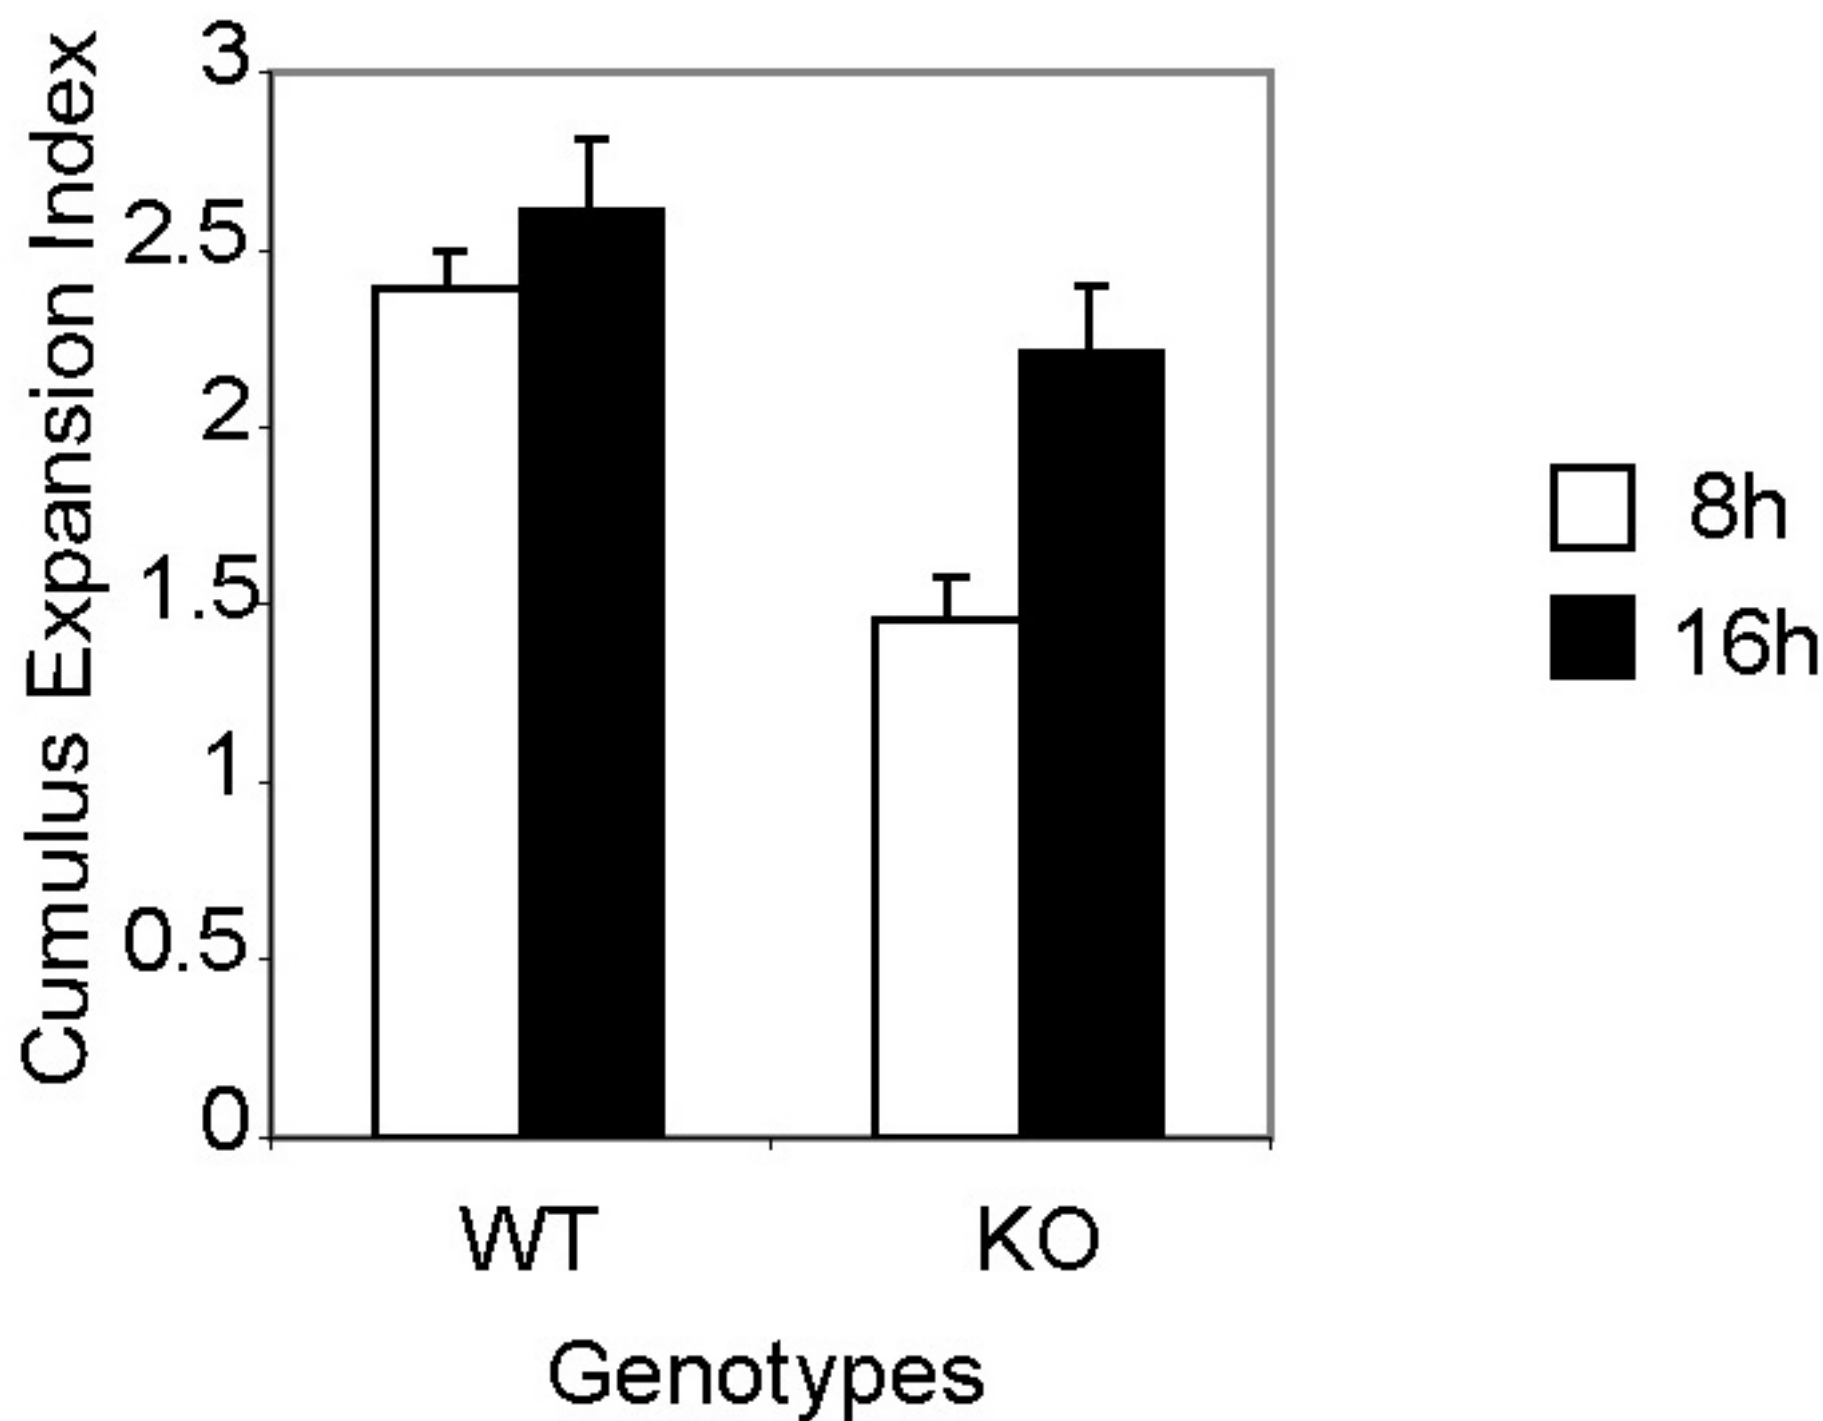

*Ereg*

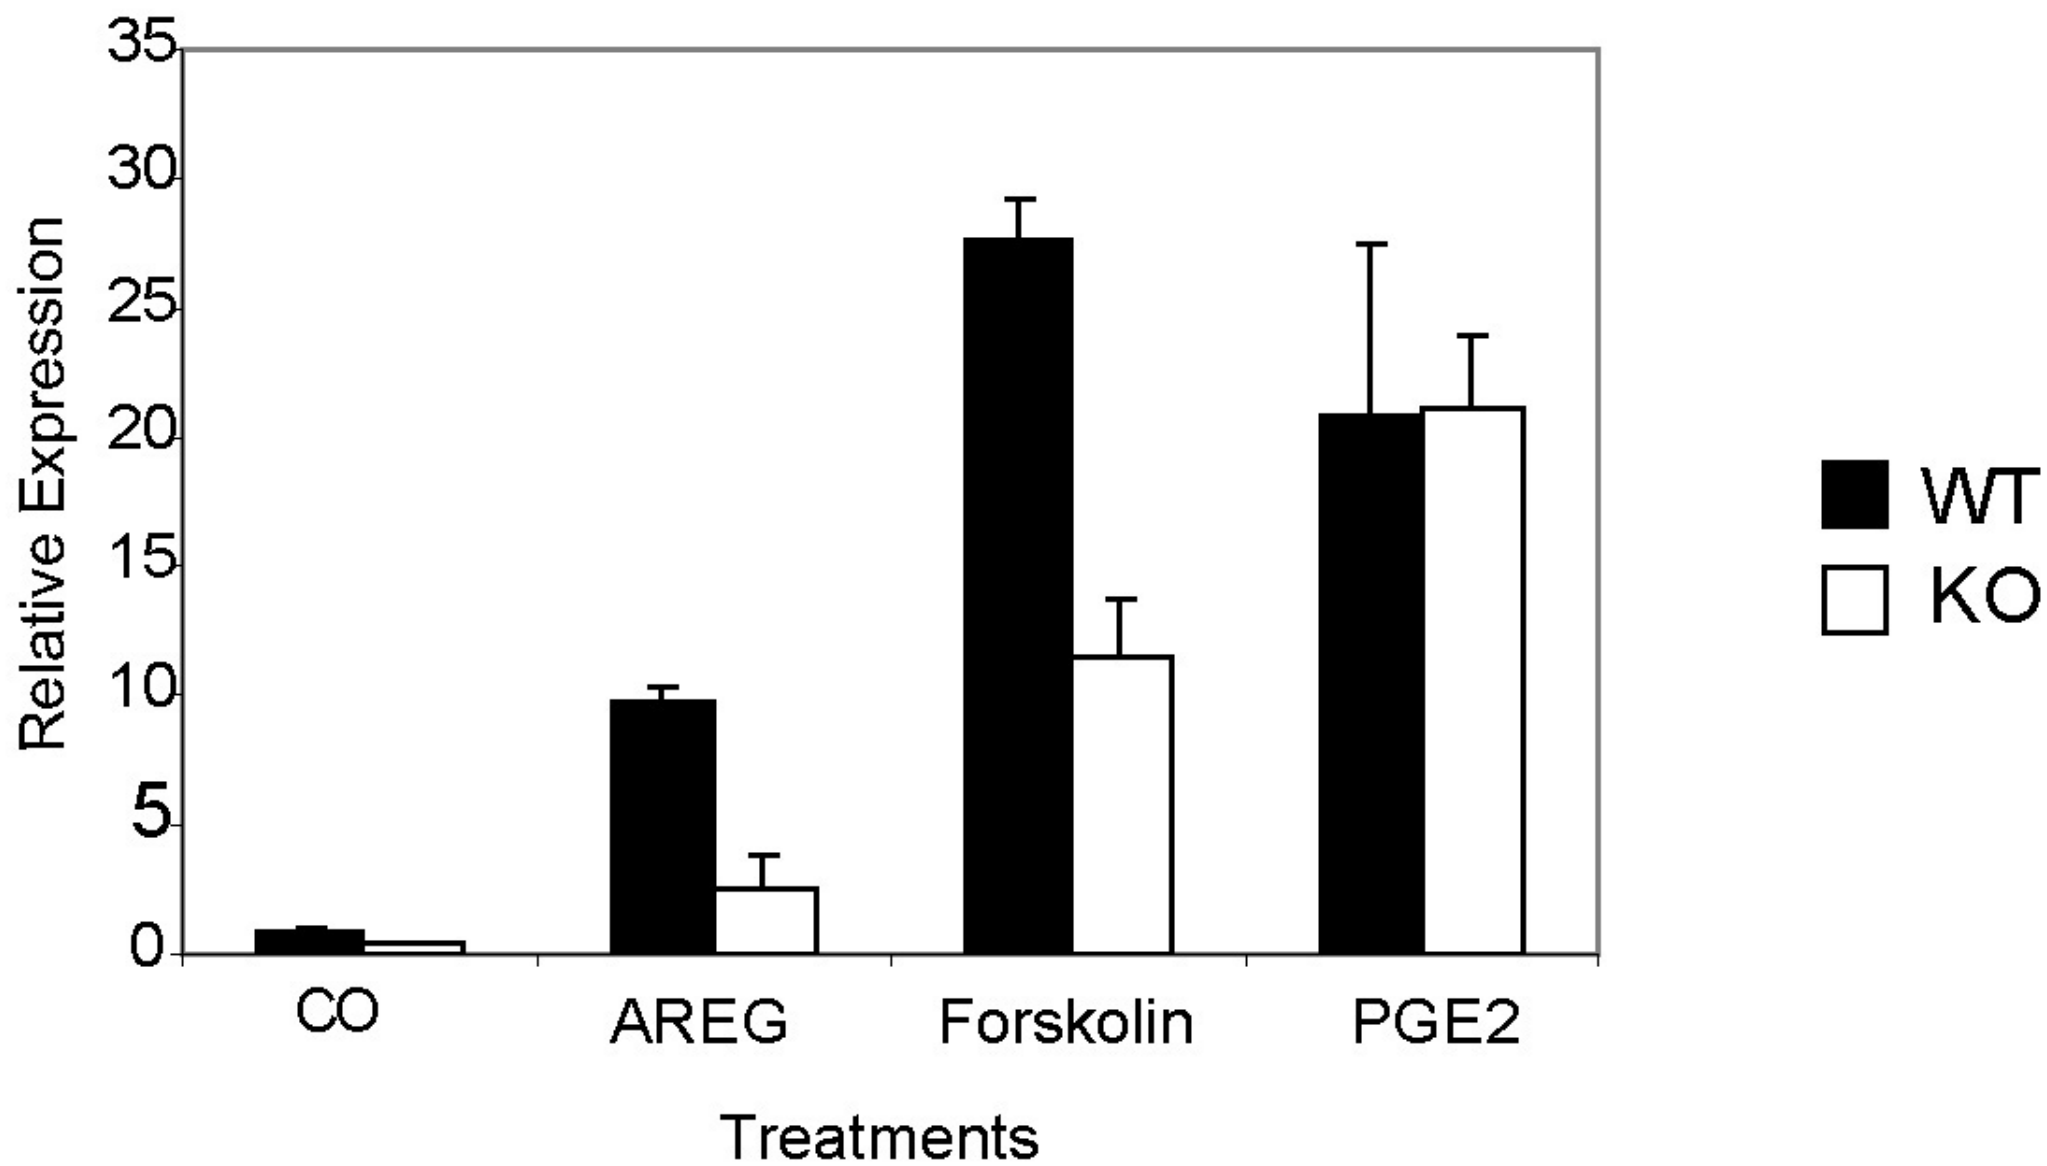

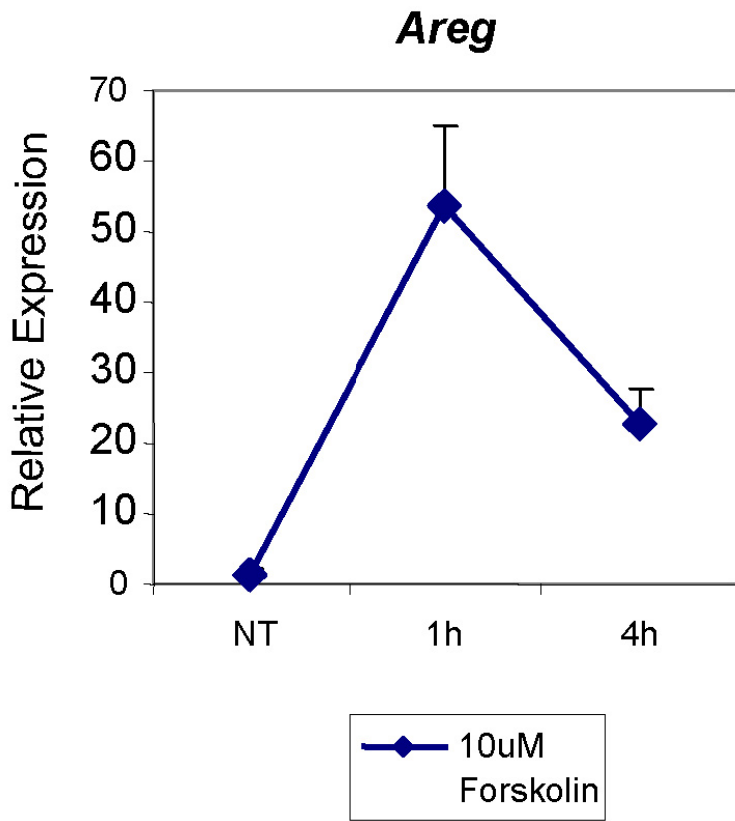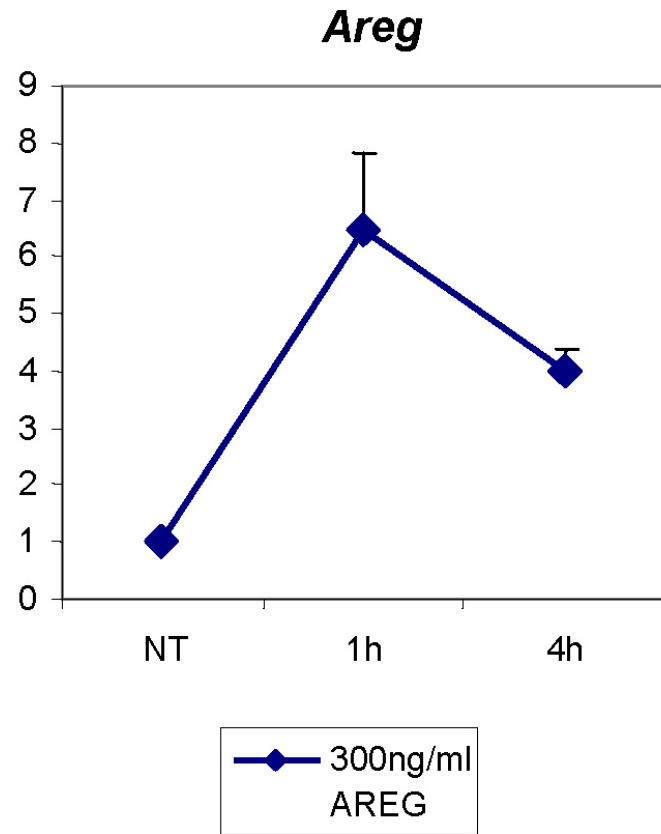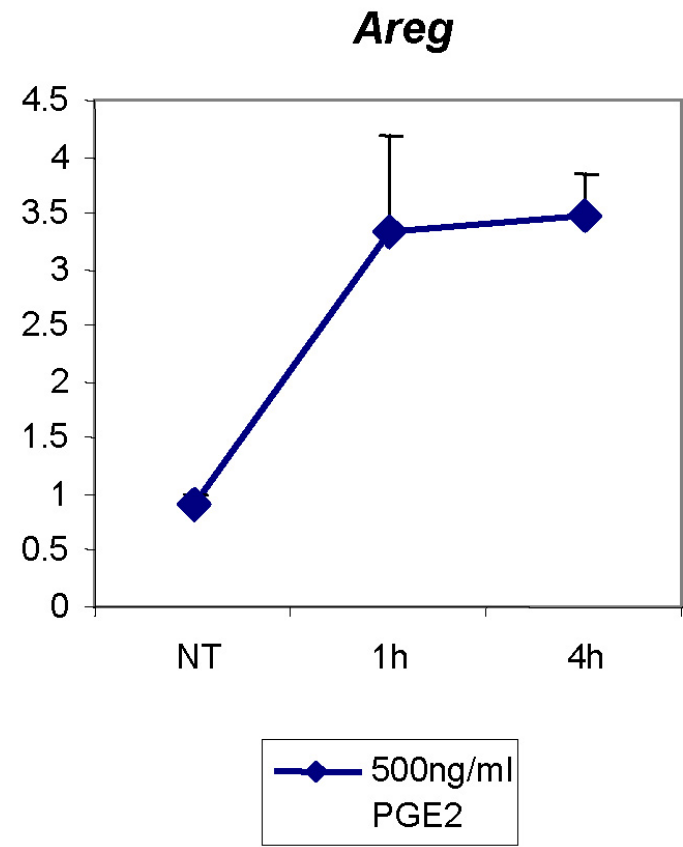

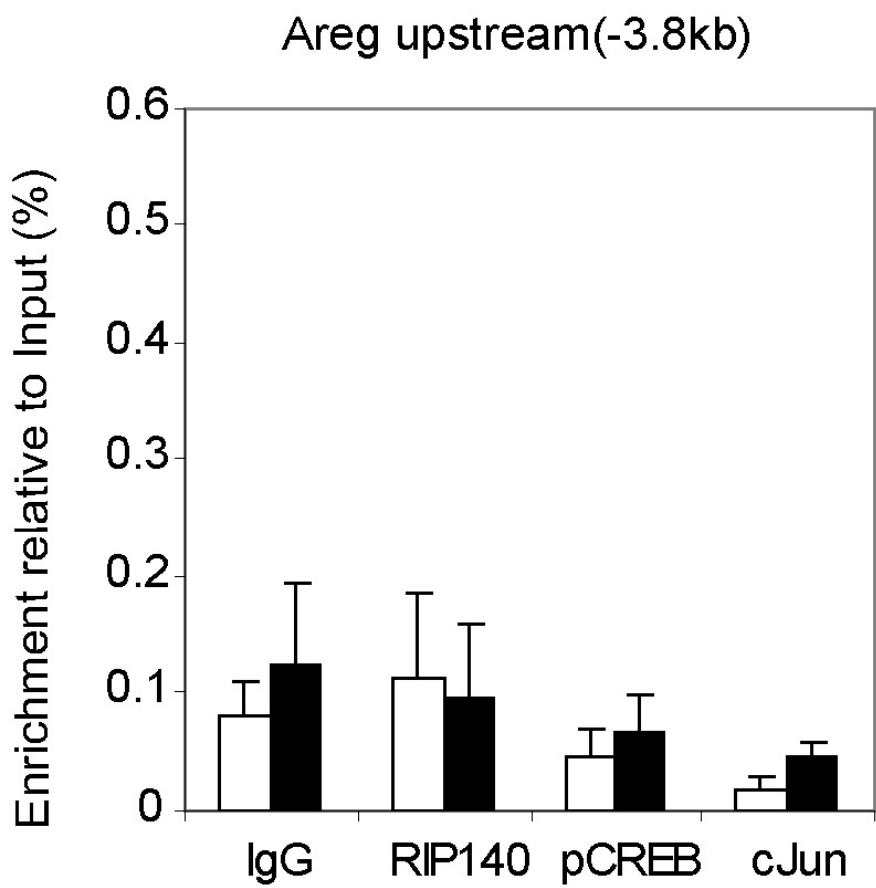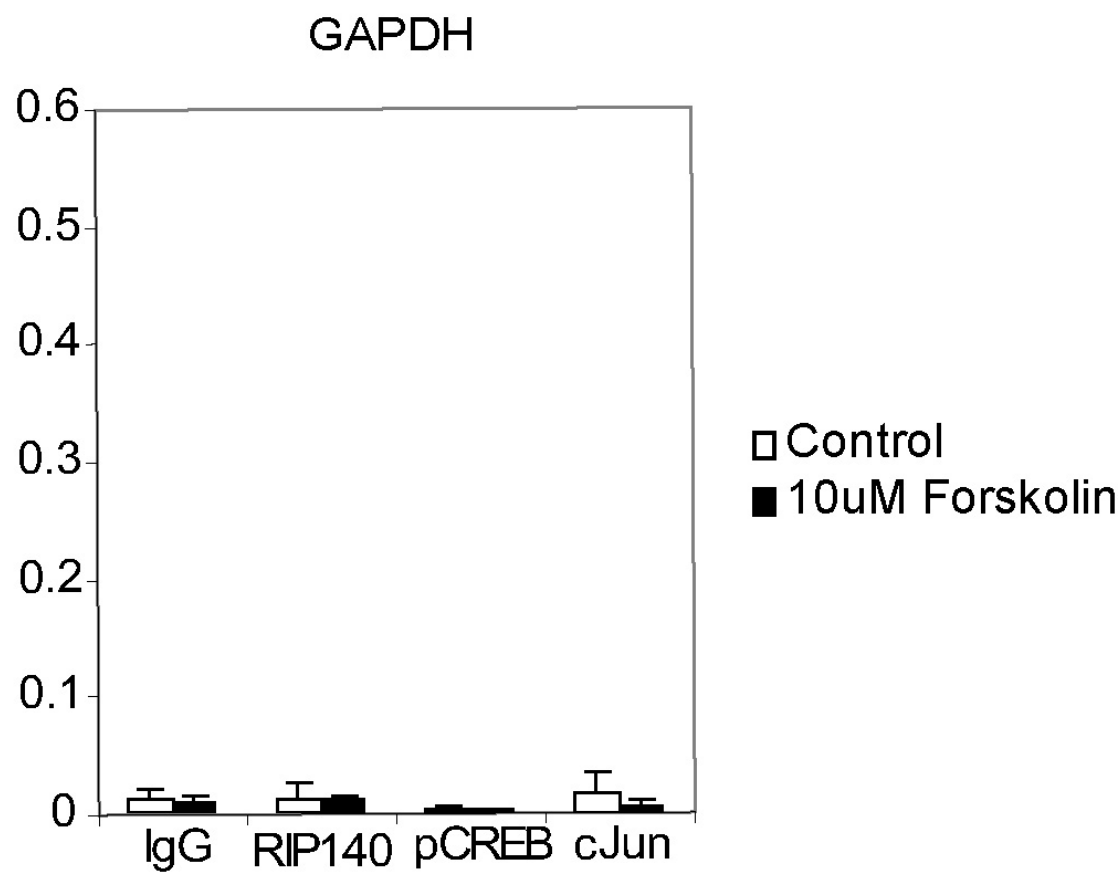



Table 1: Primers Used for In Situ hybridization analysis

| Primer Name  | Primer Sequence            |
|--------------|----------------------------|
| AregInSituF  | TGGCAGTGAACTCTCCACAG       |
| AregInSituR  | CAATTGCATGTCACCACCTC       |
| EregInSituF  | CGCTGCTTTGTCTAGGTTCC       |
| EregInSituR  | CGCAACGTATTCTTTGCTCA       |
| BtcInSituF   | TGGTAGCAGATGGGAACACA       |
| BtcInSituR   | TGAACACCACCATGACCACT       |
| mRIPInSituF1 | AGACATTGCAGCAGAGCCCCGAAC   |
| mRIPInSituR1 | CGAGGCCGCCGCGGCTCCGGGCCGCC |

| <b>Primers used for Q-PCR</b>                                  |                                                                       |
|----------------------------------------------------------------|-----------------------------------------------------------------------|
| <b>Gene</b>                                                    | <b>Primer Sequences, Forward Primer (F), Reverse Primer (R) 5'-3'</b> |
| <i>Areg</i>                                                    | F:TCCGGCTATATTATAGATGATTCAGTCA<br>R:TCTCCTTCTGTCTTGTTTTCTTGG          |
| <i>Ereg</i>                                                    | F:GCTCCCTGCCTCTTGGGT<br>R:TGCCTGTAGAAGGTGGGAACC                       |
| <i>Btc</i>                                                     | F:CCAATGGCTCTCTTTGTGGAG<br>R:TGGGTTTTCACTTTCTGTCTAGGG                 |
| <i>Nrip1</i>                                                   | F:CCCCAGTACCAACAGGACTACC<br>R:TGAACGTGGCGGAATTTTGT                    |
| <i>RPL7</i>                                                    | F:AGCGAGGCTACGGCAAAA<br>R:GAGACCGAGCAATCAAGGAATT                      |
| <i>Tnfrif6</i>                                                 | F:GGTGGTCGTCTCGCAACCTA<br>R:CAAGCAGCACAGACATGGAA                      |
| <i>Has-2</i>                                                   | F:CAGACAGGCGGAGGACGA<br>R:AGAAACCTCTCACAATGCATCTTG                    |
| <i>Ptx-3</i>                                                   | F:TTGCTGAGACCTCGGATGAC<br>R:GCGAGTTCTCCAGCATGATGA                     |
| <b>Primers for generating Amphiregulin deletion constructs</b> |                                                                       |
| Areg -935/+65F:                                                | TAGCCCCTCACATTTGCTCT                                                  |
| Areg -758/+65F:                                                | TTTCTTCTGCCCAGCAAC                                                    |
| Areg -574/+65F:                                                | CACACTTATCCCCAGCAA                                                    |
| Areg -341/+65F:                                                | TCAAAGTCTTCGGGCTAA                                                    |
| Areg -158/+65F:                                                | AGTTTCTCCCCGCGTAAT                                                    |
| AregR :                                                        | TCAGGCTCAGCTGGAGATGT                                                  |
| <b>Primers used in the ChIP assays</b>                         |                                                                       |
| Areg CRE (0.2kb)                                               | F:CCGGTGGAAACCAATGAGAACT<br>R:TGAGCCTAAGACCAGCAGCAA                   |
| Areg Upstream(-3.8kb)                                          | F:CACTGACAATTCTGAAGGTGCTTACT<br>R:TGATGGTTACAGCAAAGCACACT             |
| GAPDH                                                          | F:TTCCTGAAGCCTGGAAGGAG<br>R:GCCAGCCTTGGTCTACAGAG                      |
| <b>Primers used in RNA interference assays</b>                 |                                                                       |
| siControl                                                      | 5'UUCUCCGAACGUGUCACGUTT3'<br>5'ACGUGACACGUUCGGAGAATT3'                |
| siCREB                                                         | 5'GGACCUUUACUGCCACAAATT3'<br>5'UUUGUGGCAGUAAAGGUCCTT3'                |
| si-c-Jun                                                       | 5'CAGUAACCCUAAGAUCUATT3'<br>5'UAGGAUCUUAGGGUUCUGTA3'                  |

Table 2
